# Supplementary material
Source: PubMed Central journal article supplement (PMC6861630)
Supplement: NIHMS1052938-supplement-Supplemental_Material.pdf [file NIHMS1052938-supplement-Supplemental_Material.pdf]

When answering the following questions, please think back to how you felt during the **previous week**:

1. How **positive** was your **mood** during the past week?

|                        |   |   |   |   |   |                  |
|------------------------|---|---|---|---|---|------------------|
| ①                      | ② | ③ | ④ | ⑤ | ⑥ | ⑦                |
| Not Positive<br>At all |   |   |   |   |   | Very<br>Positive |

2. How **negative** was your **mood** during the past week?

|                        |   |   |   |   |   |                  |
|------------------------|---|---|---|---|---|------------------|
| ①                      | ② | ③ | ④ | ⑤ | ⑥ | ⑦                |
| Not Negative<br>At all |   |   |   |   |   | Very<br>Negative |

3. How **stressed** were you during the past week?

|                        |   |   |   |   |   |               |
|------------------------|---|---|---|---|---|---------------|
| ①                      | ② | ③ | ④ | ⑤ | ⑥ | ⑦             |
| Not Stressed<br>At All |   |   |   |   |   | Very Stressed |

4. How **hungry** were you during the past week?

|                      |   |   |   |   |   |             |
|----------------------|---|---|---|---|---|-------------|
| ①                    | ② | ③ | ④ | ⑤ | ⑥ | ⑦           |
| Not Hungry<br>At All |   |   |   |   |   | Very Hungry |

5. How **bored** with your **weight control efforts** were you during the past week?

|                     |   |   |   |   |   |            |
|---------------------|---|---|---|---|---|------------|
| ①                   | ② | ③ | ④ | ⑤ | ⑥ | ⑦          |
| Not Bored<br>At All |   |   |   |   |   | Very Bored |

6. How **tempted** were you to **eat foods that were not consistent with your weight goals** during the past week?

|                       |   |   |   |   |   |                 |
|-----------------------|---|---|---|---|---|-----------------|
| ①                     | ② | ③ | ④ | ⑤ | ⑥ | ⑦               |
| Not Tempted<br>At All |   |   |   |   |   | Very<br>Tempted |

7. How **tempted** were you during the past week to **skip your planned physical activity**?

|                       |   |   |   |   |   |                 |
|-----------------------|---|---|---|---|---|-----------------|
| ①                     | ② | ③ | ④ | ⑤ | ⑥ | ⑦               |
| Not Tempted<br>At All |   |   |   |   |   | Very<br>Tempted |

8. To what degree were your **eating choices** during the past week consistent with your weight goals?

|                             |   |   |   |   |   |                    |
|-----------------------------|---|---|---|---|---|--------------------|
| ①                           | ② | ③ | ④ | ⑤ | ⑥ | ⑦                  |
| Not<br>Consistent<br>At All |   |   |   |   |   | 100%<br>Consistent |

9. To what degree were your **activity/exercise choices** during the past week consistent with your weight loss goals?

①  
Not  
Consistent  
At All

②

③

④

⑤

⑥

⑦  
100%  
Consistent

10. How much **effort** did it take to stay on track this week with your weight goals?

①  
No Effort  
At All

②

③

④

⑤

⑥

⑦  
A Great Deal  
of Effort

11. Compared to the other demands in your life, how **important** was it to you to stay on track with your weight goals this week?

①  
Not A  
Priority

②

③

④

⑤

⑥

⑦  
Essential  
Priority

12. How many days did you **weigh** yourself this week? \_\_\_\_\_ days

13. How many days did you monitor your **caloric intake** this week? \_\_\_\_\_ days

14. How many minutes did you **exercise** this week? \_\_\_\_\_ days
